# Supplementary material for: Metagenomic Investigation of a Low Diversity, High Salinity Offshore Oil Reservoir
Source: Microorganisms. 2021 Oct 31;9(11):2266. doi: 10.3390/microorganisms9112266 (PMC8621343; doi:10.3390/microorganisms9112266)
Supplement: Supplementary file 1 [file microorganisms-09-02266-s001.zip › GabrielleScheffer_Suppl. mat. S1.pdf]

Table S1: Cation and anion concentrations from the formation water from the Gulf of Mexico oil reservoir.

| Cations |              |                              | Test Method | (mg/Kg) | MW    | Valence | Factor | Meq/Kg |
|---------|--------------|------------------------------|-------------|---------|-------|---------|--------|--------|
| 1       | Aluminium    | Al <sup>3+</sup>             | ICP         | < 0.1   | 27.0  | 3       | 8.99   | n/a    |
| 2       | Ammonium     | NH <sub>4</sub> <sup>+</sup> | IC          | NT      | 18.0  | 1       | 18.04  | n/a    |
| 3       | Barium       | Ba <sup>2+</sup>             | ICP         | 594.1   | 137.3 | 2       | 68.67  | 8.7    |
| 4       | Boron        | B <sup>3+</sup>              | ICP         | 14.3    | 10.8  | 3       | 3.60   | 4.0    |
| 5       | Cadmium      | Cd <sup>2+</sup>             | ICP         | < 0.1   | 112.4 | 2       | 56.20  | n/a    |
| 6       | Calcium      | Ca <sup>2+</sup>             | ICP         | 5434.0  | 40.1  | 2       | 20.04  | 271.2  |
| 7       | Copper       | Cu <sup>2+</sup>             | ICP         | < 0.1   | 63.5  | 2       | 31.77  | n/a    |
| 8       | Chromium     | Cr <sup>3+</sup>             | ICP         | < 0.1   | 52.0  | 3       | 17.33  | n/a    |
| 9       | Iron (total) | Fe <sup>2+</sup>             | ICP         | 18.8    | 55.8  | 2       | 27.92  | 0.7    |
| 10      | Lead         | Pb <sup>2+</sup>             | ICP         | < 0.1   | 207.2 | 2       | 103.60 | n/a    |
| 11      | Lithium      | Li <sup>+</sup>              | ICP         | 3.0     | 6.9   | 1       | 6.94   | 0.4    |
| 12      | Magnesium    | Mg <sup>2+</sup>             | ICP         | 2005.0  | 24.3  | 2       | 12.15  | 165.0  |
| 13      | Manganese    | Mn <sup>2+</sup>             | ICP         | 1.4     | 54.9  | 2       | 27.47  | 0.1    |
| 14      | Nickel       | Ni <sup>2+</sup>             | ICP         | < 0.1   | 58.7  | 2       | 29.35  | n/a    |
| 15      | Phosphorus   | P <sup>3+</sup>              | ICP         | < 0.1   | 31.0  | 3       | 10.32  | n/a    |
| 16      | Potassium    | K <sup>+</sup>               | ICP         | 332.6   | 39.1  | 1       | 39.10  | 8.5    |
| 17      | Silicon      | Si <sup>4+</sup>             | ICP         | 11.6    | 28.1  | 4       | 7.02   | 1.7    |
| 18      | Sodium       | Na <sup>+</sup>              | ICP         | 45404.0 | 23.0  | 1       | 22.99  | 1975.0 |
| 19      | Strontium    | Sr <sup>2+</sup>             | ICP         | 632.8   | 87.6  | 2       | 43.81  | 14.4   |
| 20      | Zinc         | Zn <sup>2+</sup>             | ICP         | 0.6     | 65.4  | 2       | 32.70  | 0.0    |

| Anions |             |                                                                              | Test Method | (mg/Kg) | MW    | Valence | Factor | Meq/Kg |
|--------|-------------|------------------------------------------------------------------------------|-------------|---------|-------|---------|--------|--------|
| 1      | Acetate     | CH <sub>3</sub> COO <sup>-</sup>                                             | IC          | 7.1     | 59.04 | 1       | 59.04  | 0.1    |
| 2      | Bicarbonate | HCO <sub>3</sub> <sup>-</sup>                                                | IC          | 60.1    | 61.02 | 1       | 61.02  | 1.0    |
| 3      | Bromide     | Br <sup>-</sup>                                                              | IC          | 214.0   | 79.90 | 1       | 79.90  | 2.7    |
| 4      | Butyrate    | CH <sub>3</sub> CH <sub>2</sub> CH <sub>2</sub> CO <sub>2</sub> <sup>-</sup> | IC          | < 0.9   | 88.11 | 1       | 88.11  | n/a    |
| 5      | Carbonate   | CO <sub>3</sub> <sup>2-</sup>                                                | IC          | 0.0     | 60.02 | 2       | 30.01  | 0.0    |
| 6      | Chloride    | Cl <sup>-</sup>                                                              | IC          | 83211.0 | 35.50 | 1       | 35.50  | 2344.0 |
| 7      | Fluoride    | F <sup>-</sup>                                                               | IC          | < 0.1   | 19.00 | 1       | 19.00  | n/a    |
| 8      | Formate     | HCOO <sup>-</sup>                                                            | IC          | < 1.0   | 45.02 | 1       | 45.02  | n/a    |
| 9      | Glycolate   | OHCCOO <sup>-</sup>                                                          | IC          | < 0.9   | 76.05 | 1       | 76.05  | n/a    |
| 10     | Hydroxide   | OH <sup>-</sup>                                                              | IC          | 0.0     | 17.00 | 1       | 17.00  | 0.0    |
| 11     | Nitrate     | NO <sub>3</sub> <sup>-</sup>                                                 | IC          | < 0.8   | 62.01 | 1       | 62.01  | n/a    |
| 12     | Nitrite     | NO <sub>2</sub> <sup>-</sup>                                                 | IC          | < 1.1   | 46.01 | 1       | 46.01  | n/a    |
| 13     | Phosphate   | PO <sub>4</sub> <sup>3-</sup>                                                | IC          | < 1.3   | 94.97 | 3       | 31.66  | n/a    |
| 14     | Propionate  | CH <sub>3</sub> CH <sub>2</sub> CO <sub>2</sub> <sup>-</sup>                 | IC          | < 0.9   | 73.07 | 1       | 73.07  | n/a    |
| 15     | Sulphate    | SO <sub>4</sub> <sup>2-</sup>                                                | IC          | < 0.6   | 96.06 | 2       | 48.03  | n/a    |
