# Supplementary material for: Metagenomic Investigation of a Low Diversity, High Salinity Offshore Oil Reservoir
Source: Microorganisms. 2021 Oct 31;9(11):2266. doi: 10.3390/microorganisms9112266 (PMC8621343; doi:10.3390/microorganisms9112266)
Supplement: Supplementary file 1 [file microorganisms-09-02266-s001.zip › GabrielleScheffer_Suppl. Mat. S2.xlsx]

## Sheet: Metabolism summary
		MAG #		MAG 8	MAG 9	MAG 1	MAG 2	MAG 3	MAG 4	MAG 5	MAG 6	MAG 7
		Taxonomy		BM520	Geotoga petraea	Geotoga petraea	Arhodomonas aquaeolei	Methanohalophilus euhalobius	Marinobacter persicus	Flexistipes sinusarabici	Halanaerobium congolense	QPJE01
Nitrogen	Dissimilatory nitrate reduction	NarG	K00370		2		1			1
		NarH	K00371		2		1			1
		NarI	K00374		2		1			1
		NapA	K02567							2
		NapB	K02568
		NirB	K00362				1				1	1
		NirD	K00363				1
		NrfA	K03385		1
		NrfH	K15876		1
	Assimilatory nitrate reduction	NarB	K00367
		NR	K10534
		NasA	K00372				1
		NasB	K00360
		NIT-6	K17877
		NirA	K00366
	Denitrification	NarG	K00370		2		1			1
		NarH	K00371		2		1			1
		NarI	K00374		2		1			1
		NapA	K02567							2
		NapB	K02568
		NirK	K00368
		NirS	K15864						1
		NorB	K04561		1		1		1
		NorC	K02305				1		1
		NosZ	K00376				1		1
	Nitrogen fixation	NifD	K02586
		NifK	K02591
		NifH	K02588
		AnfG	K00531
		VnfD	K22896
		VnfK	K22897
		VnfG	K22898
		VnfH	K22899
	Nitrification	AmoC	K10946
		AmoA	K10944
		AmoB	K10945
		Hao	K10535
		NxrA	K00370		2		1			1
		NxrB	K00371		2		1			1
	Annamox	NirK	K00368
		NirS	K15864						1
		Hsz	K20932, 20933, 20934
		Hdh	K20935
Sulfur	Assimilatory sulfate reduction	PAPSS	K13811
		Sat	K00958				1
		CysCN	K00955		1				1	2	2	1
		CysN	K00956
		CysD	K00957		1				1	2	1	1
		PAPSS	K13811
		CysCN	K00955		1				1	2	2	1
		CysC	K00860		1	1					1	1
		CysH	K00390		1		1	1	1	3
		CysJ	K00380				3		1
		CysI	K00381				1		1	1
		Sir	K00392						1
	Dissimilatory sulfate reduction and oxidation	Sat	K00958				1
		AprA	K00394
		AprB	K00395
		DsrA	K11180
		DrsB	K11181
	SOX system	SoxA	K17222
		SoxX	K17223
		SoxB	K17224
		SoxY	K17226
		SoxZ	K17227
		SoxC	K17225				1
		SoxD	K22622				1
		SoxB	K17224
	Thiosulfate reduction	psrA	K08352, K08353, K08354		1,0,1					2,0,0
			K08357, K08358, K08359				1,1,1
Fermentation	Hydrogenases	Hydrogenases	K18005		1
		Hydrogenase hypF	K04656							1
		Hydrogenase hydA	K06282							3
	Peptidases	aminopeptidase N	K01256				1		1
		D-aminopeptidase	K01266									1
		dipeptidase	K01270		2					1
			K01271	1			2		1	1		1
			K01273		1
			K01284		1
			K01305	1								1
			K05995		1
			K08641			1
		MotA	K02556						1		1	1
		MotB	K02557	1					1		1	1
		ribokinase	k00852	1							2	1
		XAnA	K15778				1		1	1
		Leucyl aminopeptidase	K01255		1		3		1	1
		Lipoprotein signal peptidase	K03101	1	1		1		1	1	1	1
		Oligoendopeptidase F	K0862	2								1
		Peptidase family C25	K11749		1	1	2		1	1		1
		Phosphoserine aminotransferase	K00831		1		1		1
	Compound production	Alcohol production	-		x		x	x	x	x	x	x
		Succinate production (Glyoxylate cycle )	-	0	0.6	0	0.8	0.2	0.8	0.2	0.6	0
		Acetate production (pt3)	-							x
		Acetate production (pt2)	-	x	x		x	x	x	x	x	x
		Acetate production (pt1)	-		x				x	x	x	x
		Butyrate production (pt2)	-	x	x	x						x
		Butyrate production (pt1)	-	x	x	x						x
		Reductive acetyl-coA pathway (Wood-Ljungdahl pathway)	-	0.29	0.14	0.14	0.29	0.14	0.29	0.57	0.29	0.57

## Sheet: Adaptation summary
		MAG #		MAG 8	MAG 9	MAG 1	MAG 2	MAG 3	MAG 4	MAG 5	MAG 6	MAG 7
		Taxonomy		BM520	Geotoga petraea	Geotoga petraea	Arhodomonas aquaeolei	Methanohalophilus euhalobius	Marinobacter persicus	Flexistipes sinusarabici	Halanaerobium congolense	QPJE01
Salt-in strategy	2-component system OmpR family sensor histidine kinase	K07646	kdpD						1
		K07667	kdpE						1
	K+transporting ATPase ATPase F chain	K01545	kdpF
	K+transporting ATPase ATPase A chain	K01546	kdpA			1			1			1
	K+transporting ATPase ATPase B chain	K01547	kdpB			2			1
	K+transporting ATPase ATPase C chain	K01548	kdpC			1			1
	Na+:H+ antiporter	K03315, K07084	nhaC			1			1		1	2
	multicomponent Na+:H+ antiporter	K05565	mnhA, mrp					1
		K05566	mnhB	1		2		1		2	1	1
		K05567	mnhC	1		2		1		1	1	1
		K05568	mnhD	1		2		1		3	2	1
		K05569	mnhE	1		2		1		1	1	1
		K05570	mnhF	1		1		1		1	1	1
		K05571	mnhG	2		2		1		1	1	1
	Polyhydroxyalkanoate (PHA) K transporters (multi-subunit)	K05559	phaAB				1		1
		K05560	phaC				1		1
		K05561	phaD				1		1
		K05562	phaE				1		1
		K05563	phaF				1		1
		K05564	phaG				1		1
	trkA type sodium hydrogen exchanger	K03499	trkA, ktrA		3	8	2		1	3	1	5
	trkH type K uptake	K03498	trkH, ktrB	2	2	3	2		1	3	1	2
Compatible solutes strategy	choline/glycine/proline betaine transport protein	K02168	betP,T,S		1			1		2
	choline/carnitine/betaine/glycine/BCCT transporter	K03451							2
	L-carnitine/gamma-butyrobetaine antiporter	K05245
	choline dehydrogenase	K00108, K11440	betA				2		1
	betaine-aldehyde dehydrogenase	K00130	betB				1		1
	choline-glycine betaine transporter	k05020	betL			1	2		1
	Proline/betaine (ProP) MFS transporter, PPII, proline permease II	K03762	proP				2		1
	proline/betaine (ProP effector)	K03607	proQ				1
	glycine-betaine/proline transport system ATP binding protein	K02000	proV	1	1	1	2		1	1	1	1
	glycine-betaine/proline transport system permease protein	K02001	proW	1	1	1	2		1	1	1	1
	glycine-betaine/proline transport system substrate binding protein	K02002	proX	1	1	1	7		1	3	1	1
	glutamine transport system substrate-binding protein	K10036	glnH				2		1	1
	glutamine transport system permease protein	K10037	glnP				2		1	1
	glutamine transport system ATP-binding protein	K10038	glnQ				2		1	1
	Osmoprotectant transport system substrate binding protein	K05845	opuC	1			1		1	2
	Osmoprotectant transport system permease	K05846	opuBD	2			2		2	4
	Osmoprotectant transport system ATP-binding protein	K05847	opuA	1			1		1	2
	glycine-betaine transporter	K05020	opuD			1	2		1
	glycine/sarcosine N-methyltransferase	K18896					2	1
	sarcosine/dimethylglycine N-methyltransferase	K18897					2	1
	ectoine synthase	K06720	ectC				2		3	1
	ectoine hydroxylase	K10674	ectD				2		1
	diaminobutyrate aminotransferase	K00836	ectB				2		1	2
	diaminobutyrate acetyltransferase	K06718	ectA				2		1	1
	ectoine/hydroxyectoine transporter (ATP binding)	K02028	ehuA							2	2	1
	ectoine/hydroxyectoine transporter (permease)	K02029	ehuC, D			2				5	3	1
	ectoine/hydroxyectoine transporter (aa binding)	K02030	ehuB			1			4	3	2	1
	Ectoine/5-Hydroxyectoine TRAP transporter					OK	OK		OK	OK	OK	OK
	sorbitol/mannitol transport system	K10227	smoE, mtlE
		K10228	smoF
		K10229
		K10230
	sorbitol transporter subunit II A, B, C	K02783	srlA									1
		K02781	srlB									1
		K02782	srlE									1
	mannosyl-3-phosphoglycerate synthase	K05947	mpgSP
	mannitol-1-phosphate 5-dehydrogenase	K00009	mtlD
	Mannitol transporter PTS system, IIB, C	K02798	mtlA
	maltose transport	K10109	malF	2
		K10110	malG	1
	multiple sugar transport system ATP-binding protein	K10111	malK, mltK
	maltooligosyl trehalose synthase	K06044	treY
	maltooligosyl trehalose trehalohydrolase	K01236	treZ
	trehalose phosphorylase	K05342	treP	1		1					2	1
	trehalose synthase	K05343	treS	1	1
	trehalose 6-phosphate synthase	K00697	otsA								1	1
		K01087	otsB								1	1
	trehalose transport system ATP-binding protein	K17314	treV
		K10671	grdE								1
		K21578	grdI
		K21583	grdG
		K10793	prdA									1
Magnesium transport		K06213	mgtE	1			1		1		1	2
		K03284	corA	1	2	1	1	2		1	1
Calcium transport		K07301		2	1	1	4	2	3	1	1	1
		K05774							1	2
Radionuclides resistance			Nudix	1	1				1	1	1	1
			SufB	1	1				1	1	1	1
			MutS	1	1				1	1	1	1

## Sheet: Biofilm QS
	MAG #		MAG 8	MAG 9	MAG 1	MAG 2	MAG 3	MAG 4	MAG 5	MAG 6	MAG 7
	Taxonomy		BM520	Geotoga petraea	Geotoga petraea	Arhodomonas aquaeolei	Methanohalophilus euhalobius	Marinobacter persicus	Flexistipes sinusarabici	Halanaerobium congolense	QPJE01
Quorum sensing	LasI	K13060				1
	LasR	K18304
	pqsH	K17940
	phnA	K01657				1	1	1		1
	phnB	K01658				1	1	2		1
	pqssA	K18000
	pqsB	K18001
	pqsC	K18002
	pqsD	K18003
	pqsE	K20257
	pqsH	K17940
	pqsR	K19735
	rhII	K13061
	rhIR	K18099
	phzI	K13061
	phzR	K18099
	phzA	K20260
	phzC	K01626				1		2
	phzD	K20261
	phzE	K13063
	phzF	K06998				1
	phzG	K20262
Biofilm	flgA	K02386	1		1	1		1		1	1
	flgD	K02389	1			1				1	1
	flgI	K02394	1		1	2				1	1
	flgJ	K02395	1		1	1				1	1
	flgL	K02397			1	1					1
	flgK	K02396			1	1				1	1
	MotA	K02557	1			2		4		2	1
	MotB	K02558		1		1		1
	MotC	K10564
	MotD	K10565
	FlgM	K02398						1		1	1
	FlgN	K02399						1
	flgY	K02424
	flgZ	K02425
	flgE	K02390	1			1				1	1
	flgF	K02391				1
	flgG	K02392	2		2	2				2	2
	flgH	K02393	1		1	2				1	1
	flgI	K02394	1		1	2				1	1
	fliE	K02408	1		2	1				2
	fliF	K02409	1		1	1				1	1
	flgB	K02387	1		2	1				2
	flgC	K02388	1		1	1				2
	fliH	K02411	1		1	1				1	1
	fliG	K02410	1		1	1				1	1
	FliK	K02414				1
	FliJ	K02413	1		1	1				1	1
	fliM	K02416	1		1	1				1	1
	fliN	K02417	1		1	1				1	1
	MotX	K21217
	MotY	K21218						1
	flhB	K02401			1	1				1	1
	flhE	K03516
	flhA	K02400	1		1	1				1	1
	FlgO	K24344
	flgP	K09860						1
	flgQ	K24346
	flgT	K24343
	FliC	K02406			2			2			1
	FliD	K02407			2	1		1			1
	FliS	K02422			1	1		1		2
	FliT	K02423
	fliL	K02415	1		1	1		1		1	1
	fliQ	K02420	1		1	1				1	1
	FliO	K02418	1		1	1				1	1
	fliR	K02421	1		1	1				1	1
	fliP	K02419	1		1	1				1	1
	fliS	K02422			1	1		1		2
	PilJ	K02660				1		1	2
	PilL	K02659				1		1
	chpA	K06596				1		2	2
	chpC	K06598				1		1
	pilH	K02658				1		1	2
	pilG	K02657				1		1
	cyaB	K01768	1		1	2			1
	cpdA	K03651						1
	vfr	K10914			1	1		1		1	2
	fleQ	K10941				1
	exsA	K20968
	mvtR	K19735
	SagS	K20973
	Pa1611	K20974						1
	Pa1976	K20975				1
	hptB	K20976
	hsbR	K20977
	hsbA	K20978
	anti sigma	K02398						1		1	1
	sigma	K02405			1	1				1	1
	LadS	K20971
	GacS	K07678				2		1
	RetS	K20972
	GacA	K07689				1		1
	RsmY	K20969
	rmsZ	K20970
	rmsA	K03563				1		1		2
	HIS-I	K11912 etc
	wspA	K13487
	wspE	K13490
	wspBD	K13488/89
	wspF	K13491
	wspR	K11444
	sadC	K21019				1
	siaD	K21020
	TpbB	K21021
	roeA	K21022
	mucR	K21023
	fleQ	K10941				1
	Psl	K20997 K21001 to 21005
	PelA	K21006
	pelB	K21007
	PelC	K21008
	PelD	K21009
	pelE	K21010
	pelF	K21011
	pelG	K21012	2
	Alg44	K19291
	FimX	K21025				1		1
	FimW	K23127						1
											OK - not paper		Metabolism	Prolipoprotein signal peptidase II
											OK - not paper		Metabolism	Sporulation protein SeaA involved in spore envelope assembly
													Coat	Spore coat polysaccharide biosynthesis protein SpsK (dTDP-4-dehydrorhamnose reductase)
													Coat	Spore coat polysaccharide biosynthesis protein SpsK (dTDP-4-dehydrorhamnose reductase)
											OK - not paper		Metabolism	Altronate hydrolase
											OK - not paper		Replication	Endonuclease IV
											OK - not paper		Transport	Methionine-binding lipoprotein of a Tct-type transporter
											OK - not paper		Transport	Predicted permease
													Coat	Alanine racemase
													Coat	Alanine racemase
											OK - not paper		Stress	Arsenate reductase
											OK - not paper		Stress	Asp23/Gls24 family envelope stress response protein
											OK - not paper		Metabolism	Prolipoprotein signal peptidase II
													Coat	Spore coat polysaccharide biosynthesis protein SpsK (dTDP-4-dehydrorhamnose reductase)
													Coat	Spore coat polysaccharide biosynthesis protein SpsK (dTDP-4-dehydrorhamnose reductase)
											OK - not paper		Metabolism	Altronate hydrolase
											OK - not paper		Stress	peroxide stress protein YaaA
											OK - not paper		Replication	ATP-dependent nucleic acid helicase

## Sheet: Endosporulation
	MAG #	MAG 6	MAG 7
	Taxonomy	Halanaerobium congolense	QPJE01
acyl homoserine lactone synthase	BMY48_RS01240	100	91.07
	BMY48_RS05165	no match	55.28
	BMY48_RS10200	100	no match
anthranilate synthase component	BMY48_RS05900	99.62	53.21
	BMY48_RS08100	99.56	68.67
	BMY48_RS13120	99.6	40
	BMY48_RS09820	100	63.08
	BMY48_RS01290	100	41.49
	BMY48_RS09990	100	40.68
	BMY48_RS06635	99.63	81.2
	BMY48_RS11620	99.56	74.67
	BMY48_RS11995	43.36	44.95
	BMY48_RS03390	99.55	46.28
	BMY48_RS11990	28.2	31.42
	BMY48_RS04975	99.57	47.31
	BMY48_RS03395	99.55	46.28
	BMY48_RS13115	99.8	34.69
	BMY48_RS11985	28.2	31.42
	BMY48_RS11625	99.56	74.67
	BMY48_RS10495	100	55.59
	BMY48_RS08105	99.56	68.67
	BMY48_RS01295	100	31.8
	BMY48_RS02490	99.65	61.05
	BMY48_RS12340	100	77.78
	BMY48_RS-8310	100	62.59
	BMY48_RS10850	100	63.89
	BMY48_RS08315	100	62.59
	BMY48_RS05960	99	52.86
	BMY48_RS05940	100	62.99
	BMY48_RS11715	100	72.94
	BMY48_RS04985	100	97.67
	BMY48_RS06750	100	63.9
	BMY48_RS06755	100	87.88
	BMY48_RS06760	100	81.82
	BMY48_RS03880	100	68.18
	BMY48_RS13405	67.09	48.33
	BMY48_RS09035	47.24	57.14
	BMY48_RS03450	99.44	49.03
	BMY48_RS06190	99.73	48.88
	BMY48_RS08280	100	73.11
	BMY48_RS05120	100	83.47
	BMY48_RS05235	50.41	62.37
	BMY48_RS05570	99.13	66.67
	BMY48_RS04945	100	63.58
	BMY48_RS03430	100	63.58
	BMY48_RS02895	100	73.7
	BMY48_RS06660	99.79	80.9
	BMY48_RS12380	100	63.37
	BMY48_RS12685	100	100
	BMY48_RS05575	100	90.48
	BMY48_RS13915	99.52	70.19
	BMY48_RS08630	39.77	43.51
	BMY48_RS02520	100	77.91
	BMY48_RS09000	100	77.91
	BMY48_RS03955	98.84	65.33
ahpF	BMY48_RS06510	100	72.64
ahpF	BMY48_RS05815	100	57.57
ahpF	BMY48_RS10035	35.39	52.02
ahpF	BMY48_RS04130
ahpF	BMY48_RS05160
ald	BMY48_RS04095	58.33	73
alr	BMY48_RS08825	99.47	no match
alr	BMY48_RS04090	70.24	no match
AmaP	BMY48_RS05825	99.44	53.89
CD0825	BMY48_RS02800	100	84.86
CD1433	BMY48_RS00415	100	100
cggR	BMY48_RS10390	99.43	74.05
csp	BMY48_RS01165	90.62	97.01
csp	BMY48_RS02545
csp	BMY48_RS02785
csp	BMY48_RS02790
ctpB	BMY48_RS06130	100	71.62
cwlC	BMY48_RS10500	98.76	55.21
cwlC	BMY48_RS03035
cwlC	BMY48_RS05405
cydD	BMY48_RS10280	100	39.6
cydD	BMY48_RS10490
cydD	BMY48_RS04795
cydD	BMY48_RS05105
dacF	BMY48_RS11755	97.81	69.06
dapA	BMY48_RS01575	36.36	36.26
dnaA	BMY48_RS08265	100	82.17
dnaA	BMY48_RS14155
dppB	BMY48_RS10060	37.89	35.38
dppB	BMY48_RS14020
dppB	BMY48_RS02825
dppB	BMY48_RS03755
dppB	BMY48_RS02565
dppC	BMY48_RS02830	99.64	46.74
dppC	BMY48_RS03750
dppD	BMY48_RS02225	44.68	43.98
eag	BMY48_RS06240	83.77	33.03
exoA	BMY48_RS08110	99.66	68.34
exuR	BMY48_RS11515	100	41.77
exuR	BMY48_RS07815
exuR	BMY48_RS02655
exuR	BMY48_RS08160
exuR	BMY48_RS00695
EzrA	BMY48_RS12970	97.35	48.08
ger	BMY48_RS10505	100	50.67
gntR	BMY48_RS12160	100	47.97
hsp20	BMY48_RS02700	94.52	72.6
hsp70	BMY48_RS13705	96.56	45.92
jag	BMY48_RS08285	100	71.29
kgsA	BMY48_RS11595	99.32	63.23
kinD	BMY48_RS03865	39.69	36.63
LexA	BMY48_RS04870	100	76.96
lgt	BMY48_RS03745	100	52.23
lonB	BMY48_RS12410	99.78	74.18
lonB	BMY48_RS03620
lspA	BMY48_RS03810	100	43.87
maf	BMY48_RS03960	98.72	46.03
Maf	BMY48_RS06720
mcsA	BMY48_RS12425	99.44	49.44
murAB	BMY48_RS06355	90.54	79.86
mutT	BMY48_RS05905	99.75	67.01
obgE	BMY48_RS06795	99.76	81.01
obgE	BMY48_RS08355
oppB	BMY48_RS01595	38.91	33.84
oppB	BMY48_RS12510
oppB	BMY48_RS08135
oppB	BMY48_RS12915
oppB	BMY48_RS07490
oppC	BMY48_RS01590	45.02	42.2
oppC	BMY48_RS11915
oppC	BMY48_RS08140
oppC	BMY48_RS02570
oppC	BMY48_RS12920
oppC	BMY48_RS07485
oppD	BMY48_RS01585	54.76	52.07
oppD	BMY48_RS08145
oppF	BMY48_RS01580	62.35	61.52
oppF	BMY48_RS08150
oppF	BMY48_RS10045
pbpG	BMY48_RS05520	100	64.08
SigE	BMY48_RS07790	100	57.8
seaA	BMY48_RS12555	65.38 (46.6)	45.71
sigF	BMY48_RS04675	73.2	86.16
sigF	BMY48_RS09500
sigH	BMY48_RS12355	100	91.32
sigH	BMY48_RS06175
soj	BMY48_RS11025	37.9	37.9
spo0A	BMY48_RS05900
spo0F	BMY48_RS00995	39.83	66.33
spo0F	BMY48_RS12125
spo0F	BMY48_RS07240
spo0J	BMY48_RS08305	100	55.36
spo0J	BMY48_RS13840
spoIIQ	BMY48_RS04865	99.12	49.35
spoVB	BMY48_RS11745	99.63	70.72
spoVC	BMY48_RS11735	100	65.41
spoVE	BMY48_RS03930	98.9	56.37
spoVE	BMY48_RS06765
spoVS	BMY48_RS05955	88.16	86.05
spoVT	BMY48_RS03015	82.43	83.12
spoVT	BMY48_RS12735
spoVT	BMY48_RS09705
spoVT	BMY48_RS04195
spoVT	BMY48_RS13720
spsI	BMY48_RS11855	32.28	32.12
spsI	BMY48_RS06200
spsJ	BMY48_RS02945
spsJ	BMY48_RS11845
spsJ	BMY48_RS11150
spsK	BMY48_RS11860	no match	no match
spsL	BMY48_RS11850	no match	no match
stress	BMY48_RS05820	100	80.73
Stress	BMY48_RS10205
USP	BMY48_RS07840	100	71.33
USP	BMY48_RS08415
uxaA	BMY48_RS07870	no match	37.87
uxuA	BMY48_RS08390	98.55	no match
Veg	BMY48_RS11610	100	75
XRE	BMY48_RS14200	45.7 (43.5)	35.42 (32)
XRE	BMY48_RS09530	99.15	58.77
XRE	BMY48_RS07710
XRE	BMY48_RS04220
yabC	BMY48_RS06620	99.65	61.79
ydcI	BMY48_RS05250	43.62	82.9
ydcI	BMY48_RS03550
ydcI	BMY48_RS12965
yerB	BMY48_RS09450	99.72	58.56
yhbA	BMY48_RS03475	99.45	42.35
yheI	BMY48_RS00910	38.43	41.6
yheI	BMY48_RS06260
SigG	BMY48_RS12255	100	32.72
ylbF	BMY48_RS11645	100	59.09 (31.2)
yloB	BMY48_RS01120	29.26	83.42
yloB	BMY48_RS12235
yloB	BMY48_RS10710
yloB	BMY48_RS10245
yloB	BMY48_RS10735
yloB	BMY48_RS10705
yloB	BMY48_RS10260
yloB	BMY48_RS10220
yloB	BMY48_RS12240
yqfU	BMY48_RS06135	100	73.93
yqhH	BMY48_RS12655	99.81	76.6
yrbC	BMY48_RS09535	99.21	82.64
ytkL	BMY48_RS07105	97.14	60.77
ytlC	BMY48_RS10695	50.62	43.02
ytlC	BMY48_RS02460
ytlC	BMY48_RS11665
ytlC	BMY48_RS12975
ytlC	BMY48_RS08185
ytlC	BMY48_RS01415
ytrE	BMY48_RS12745	100	50.39
ytrE	BMY48_RS07925
ytrE	BMY48_RS09745
ytrE	BMY48_RS10930
ytrE	BMY48_RS00160
ytrE	BMY48_RS00710
ytrE	BMY48_RS02870
ytrE	BMY48_RS02680
ytrE	BMY48_RS02640
ytrE	BMY48_RS12995
ytrE	BMY48_RS00595
ytrE	BMY48_RS12660
ytrE	BMY48_RS08780
ytrE	BMY48_RS01280
ytrE	BMY48_RS00165
ytsP	BMY48_RS02715	100	68.99
ytvI	BMY48_RS05325	no match	57.96
yusA	BMY48_RS10120	100	52.99
yusA	BMY48_RS10920
yviA	BMY48_RS10820	100	61.84
yviA	BMY48_RS03660
yxjF	BMY48_RS02175	46.25	45.78
yxjF	BMY48_RS03580
yyxA	BMY48_RS08095	100	70.91
